# Supplementary material for: Effects of Prandial Versus Fasting Glycemia on Cardiovascular Outcomes in Type 2 Diabetes: The HEART2D trial
Source: Oxford University Press journal article supplement (doi:10.2337/dc08-1671), 2009-02-26

**APPENDIX B**

**Table 1**—*Diabetes therapy at baseline (p=0·740 between groups)*

| Variable (n, %) | PRANDIAL (n=549) | BASAL (n=550) |
| --- | --- | --- |
| Diet and exercise | 46 ( 8.4%) | 54 ( 9.8%) |
| Biguanides | 41 ( 7.5%) | 33 ( 6.0%) |
| Sulfonylureas | 138 (25.1%) | 147 (26.7%) |
| Alpha-glucosidase inhibitors | 3 (0.5%) | 1 (0.2%) |
| Fast-acting insulin secretagogues | 6 (1.1%) | 3 (0.5%) |
| Metformin and sulfonylureas | 83 (15.1%) | 86 (15.6%) |
| Metformin and sulfonylurea, + any other oral | 16 (2.9%) | 11 (2.0%) |
| Other combination of oral agents | 10 (1.8%) | 13 (2.4%) |
| Basal/premixed insulin (once- or twice-daily) | 121 (22.0%) | 124 (22.5%) |
| Combination oral + basal/premixed insulin | 41 (7.5%) | 40 (7.3%) |
| Multiple daily insulin injection (MDI) [≥3 inj/day] | 38 (6.9%) | 27 (4.9%) |
| Any combination of oral agents and MDI | 2 (0.4%) | 4 (0.7%) |
| Other | 4 (0.7%) | 7 (1.3%) |

**Table 2**—*Summary and analysis of individual outcomes for time to first adjudicated event*

| Individual Outcomes* | PRANDIAL (n=557) | BASAL (n=558) | Estimated Hazard Ratio (95% CI) | p-value |
| --- | --- | --- | --- | --- |
| All-cause death | 51 (9.2%) | 51 (9.1%) | 1.00 (0.68, 1.48) | 0.982 |
| Cardiovascular death | 44 (7.9%) | 42 (7.5%) | 1.05 (0.69, 1.60) | 0.816 |
| Fatal stroke | 3 (0.5%) | 2 (0.4%) | 1.50 (0.25, 8.99) | 0.654 |
| Nonfatal stroke | 19 (3.4%) | 16 (2.9%) | 1.21 (0.62, 2.35) | 0.573 |
| Any stroke | 20 (3.6%) | 17 (3.0%) | 1.20 (0.63, 2.29) | 0.581 |
| Fatal myocardial infarction | 12 (2.2%) | 12 (2.2%) | 1.01 (0.45, 2.25) | 0.983 |
| Nonfatal clinical myocardial infarction | 53 (9.5%) | 50 (9.0%) | 1.07 (0.73, 1.58) | 0.716 |
| Silent myocardial infarction | 2 (0.4%) | 4 (0.7%) | 0.50 (0.09, 2.75) | 0.419 |
| Any myocardial infarction | 63 (11.3%) | 63 (11.3%) | 1.01 (0.71, 1.43) | 0.948 |
| Coronary revascularization  planned after randomization | 84 (15.1%) | 94 (16.8%) | 0.91 (0.68, 1.22) | 0.525 |
| Hospitalized acute coronary syndromes | 58 (10.4%) | 54 (9.7%) | 1.09 (0.75, 1.58) | 0.647 |
| Congestive heart failure | 33 (5.9%) | 37 (6.6%) | 0.90 (0.56, 1.44) | 0.662 |
| Revascularization for PVD | 11 (2.0%) | 12 (2.2%) | 0.93 (0.41, 2.11) | 0.863 |
| Amputation for PVD | 9 (1.6%) | 8 (1.4%) | 1.13 (0.44, 2.93) | 0.800 |
| Coronary angiography planned after randomization | 75 (13.5%) | 86 (15.4%) | 0.89 (0.66, 1.22) | 0.471 |

* CV death, nonfatal MI, nonfatal stroke, coronary revascularization, or hospitalized acute coronary syndrome

**Table 3**—*Summary and analysis of alternative grouped outcomes for time to first adjudicated event*

| Grouped outcome | PRANDIAL  (n=557) | BASAL  (n=558) | Estimated Hazard Ratio (95% CI) | p-value |
| --- | --- | --- | --- | --- |
|  |  |  |  |  |
| Primary outcome* | 174 (31.2%) | 181 (32.4%) | 0.98 (0.80, 1.21) | 0.866 |
| Primary outcome + all-cause death | 178 (32.0%) | 189 (33.9%) | 0.96 (0.78, 1.18) | 0.715 |
| CV death + stroke | 59 (10.6%) | 56 (10.0%) | 1.07 (0.74, 1.55) | 0.704 |
| CV death + stroke + MI | 99 (17.8%) | 98 (17.6%) | 1.04 (0.78, 1.37) | 0.807 |
| CV death + stroke + MI + coronary revascularization | 149 (26.8%) | 159 (28.5%) | 0.96 (0.77, 1.20) | 0.725 |

* CV death, nonfatal MI, nonfatal stroke, coronary revascularization, or hospitalized acute coronary syndrome

**Table 4**—*Summary and analysis of alternative grouped outcomes for time to first adjudicated event for patients meeting optimal BG targets*

| Grouped Outcome | PRANDIAL (n=117) | BASAL (n=171) | Estimated Hazard  Ratio (95% CI) | p-value |
| --- | --- | --- | --- | --- |
| Primary outcome | 31 (26.5%) | 46 (26.9%) | 0.98 (0.62, 1.55) | 0.933 |
| Primary outcome + all-cause death | 32 (27.4%) | 50 (29.2%) | 0.93 (0.60, 1.45) | 0.749 |
| CV death + stroke | 13 (11.1%) | 17 (9.9%) | 1.10 (0.54, 2.27) | 0.791 |
| CV death + stroke + MI | 17 (14.5%) | 27 (15.8%) | 0.90 (0.49, 1.65) | 0.727 |
| CV death + stroke + MI + coronary revascularization | 25 (21.4%) | 39 (22.8%) | 0.92 (0.56, 1.52) | 0.739 |

**Figure 1** Patient disposition


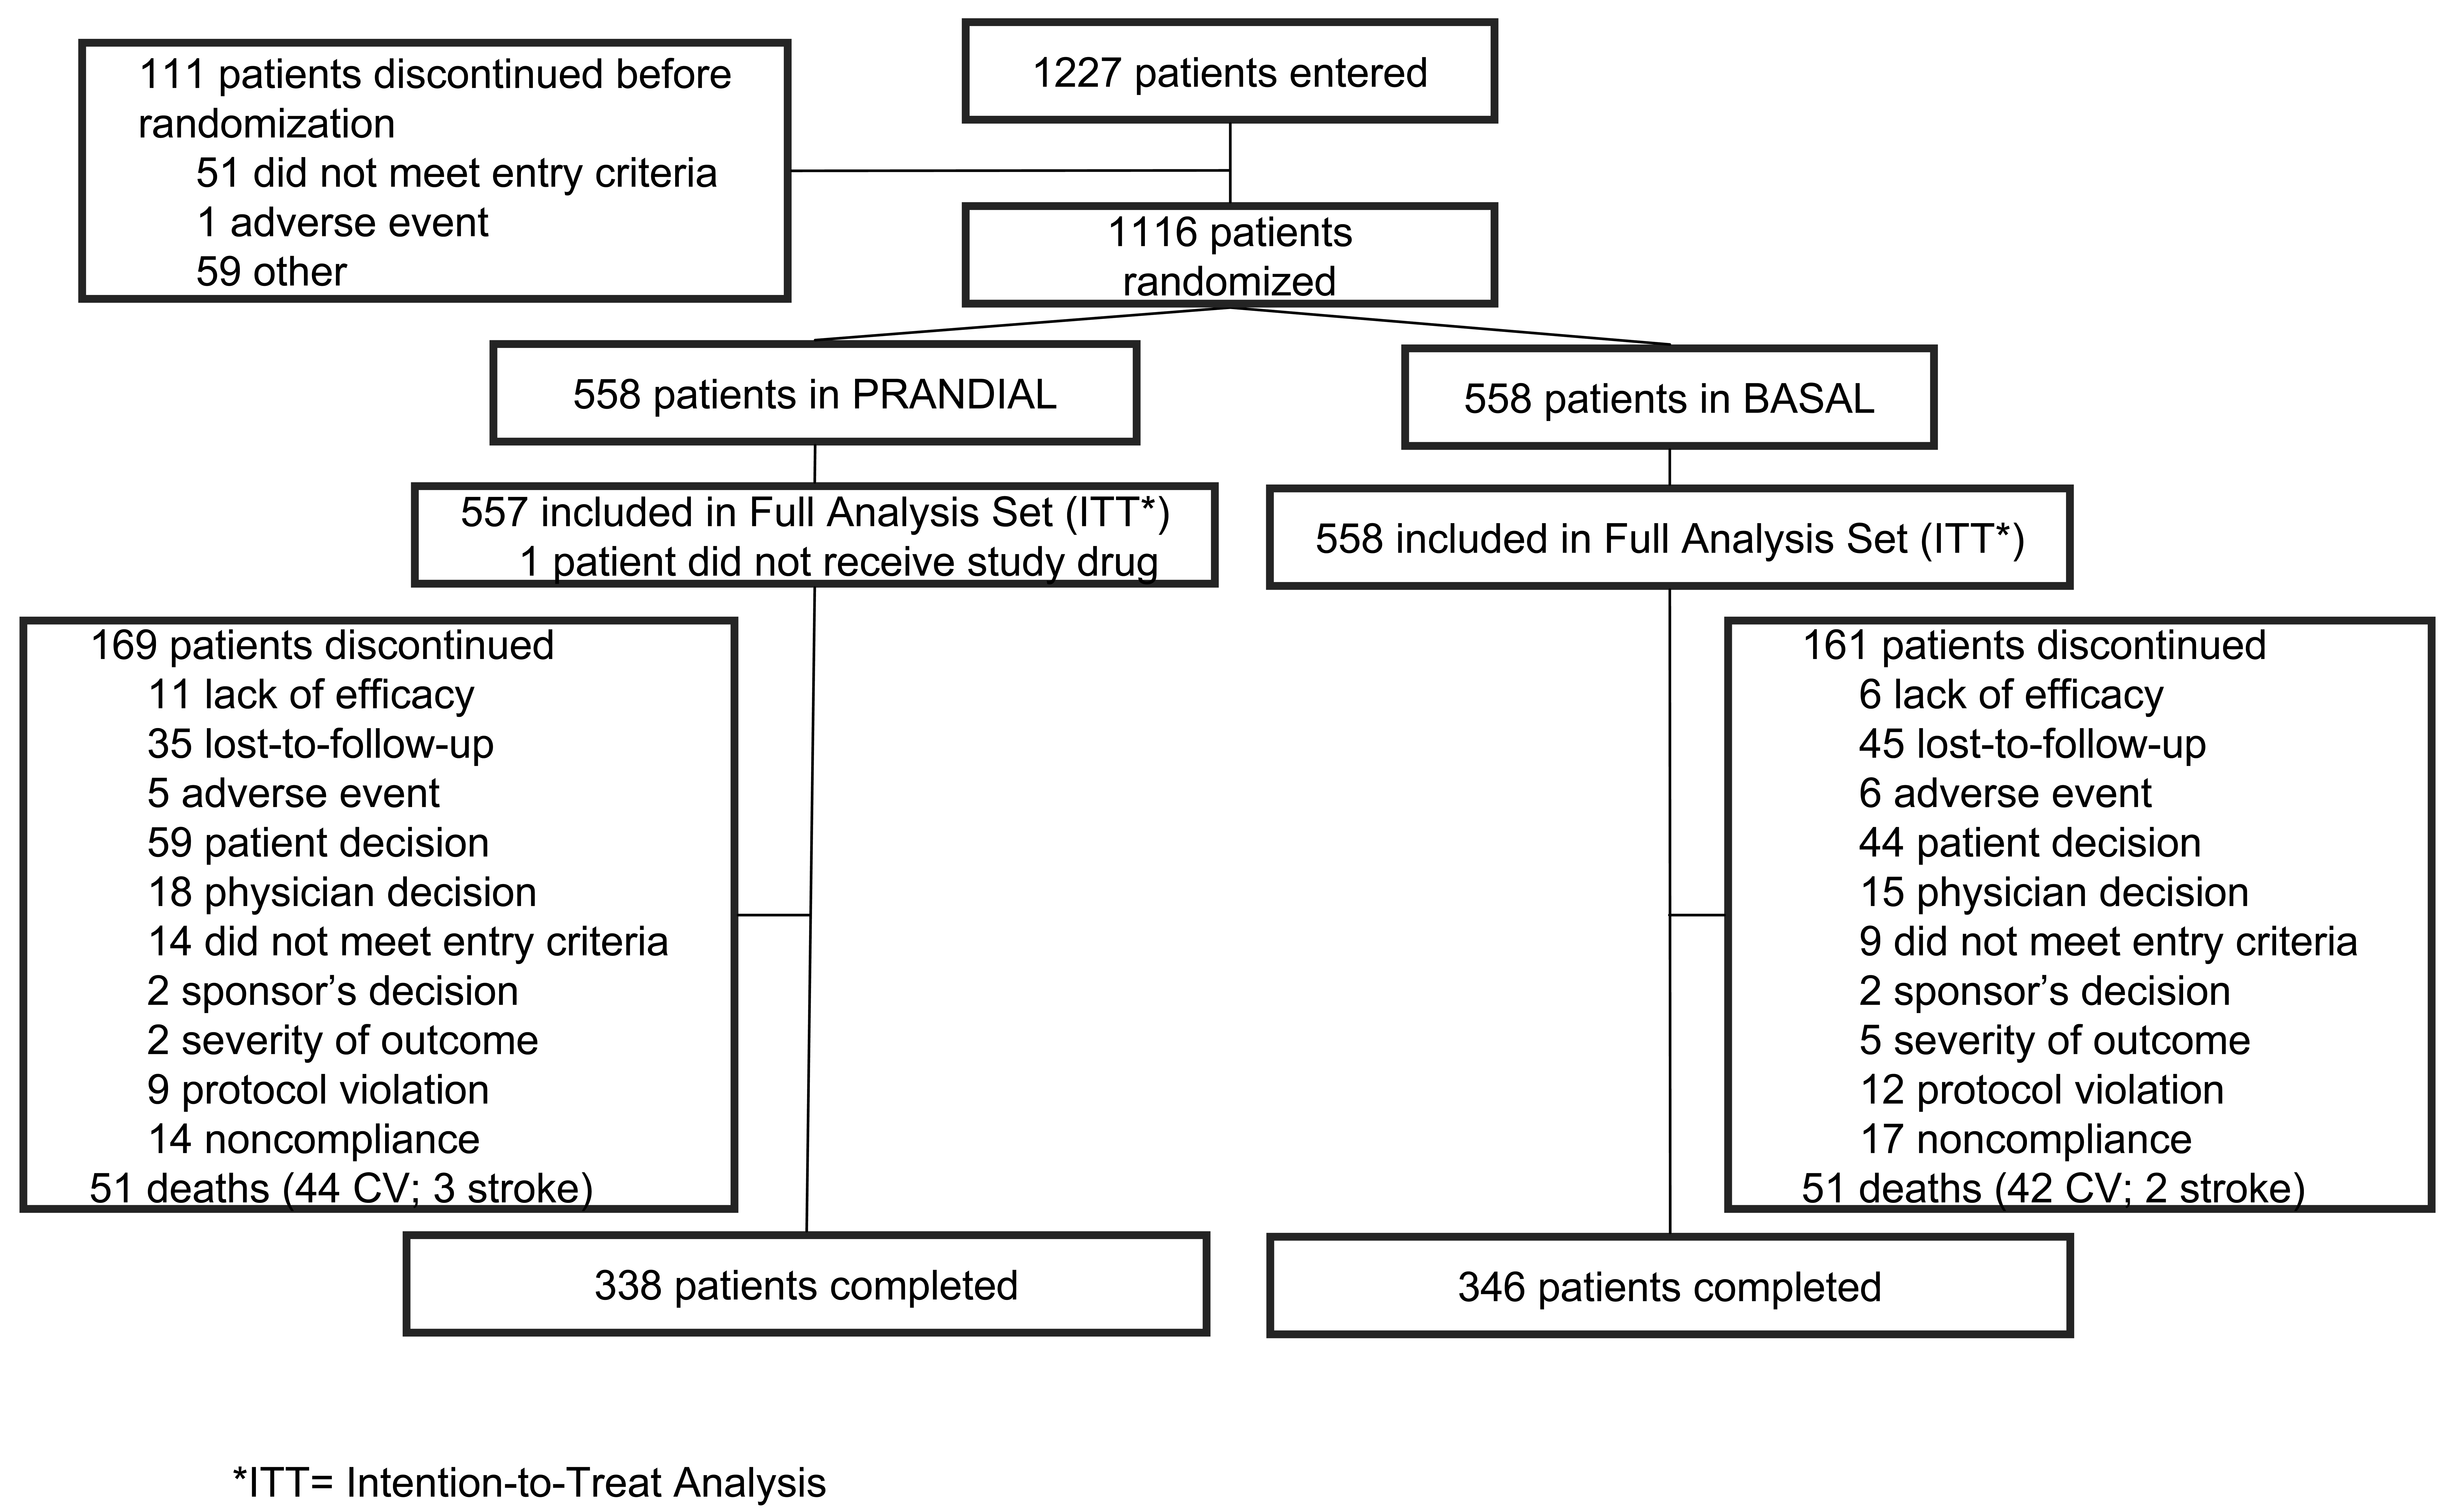

Supplement: dc08-1671_onlineappendix_b_figure_tables.doc [file dc08-1671_onlineappendix_b_figure_tables.doc]
