# Supplementary material for: Effects of Prandial Versus Fasting Glycemia on Cardiovascular Outcomes in Type 2 Diabetes: The HEART2D trial
Source: Oxford University Press journal article supplement (doi:10.2337/dc08-1671), 2009-02-26
Supplement: dc08-1671_online_appendix_a_writing_group.doc [file dc08-1671_online_appendix_a_writing_group.doc]

Appendix A

**Investigators & Contributors:** The HEART2D **investigators** are listed by country: Doctors: **Canada:** Bernard Zinman, Toronto; Robert Schlosser, Thornhill; B A Priestman, New Westminster; Pat Marshall, Victoria; Isabelle Kirouac, Sante-Foy; Colin MacDonald, Edmonton; R Dumas, Laval; **Croatia:** Zelimir Beer, Varazdin; Velimir Bozikov, Zagreb; Vanja Zjacic-Rotkvic, Zagreb; Meroslav Persic, Rijeka; Silvija Canecki, Osijek; Stjepan Balic, Zagreb; **Czech Republic:** J Skrha, Praha; Radomira Koznarova, Praha; M Kvapil, Praha; Jan Broz, Srobarova; Zdenka Krejsova, Karlovy Vary; Jirina Pavlickova, Pardubice; Libor Okenka, Hodonin; Tomas Spousta, Ostrava; Zdenka Rihova, Brno; **Germany:** Petra Ott, Dresden; J Senges, Ludwigshafen; Andreas Hamann, Heidelberg; Petra Algenstaedt, Hamburg; **Hungary:** T Oroszlan, Zalaegerszeg; Jozsef Patkay, Dunaujvaros; Tibor Fulop, Debrecen; Mihaly Dudas, Gyula; Andras Gyimesi, Bekescsaba; Istvan Preda, Budapest; G Jermendy, Budapest; **India:** Bipin Sethi, Hyderabad; Prasanna Kumar, Bangalore; Harish Kumar, Cochin; Vijayan Balaji, Madras; Nikhil Tandon, New Delhi; Nadeem Rais, Mumbai; **Israel:** J Wainstein, Holon; I Raz, Jerusalem; Ilana Harman, Beer Sheva; Tommy Herskovits, Nahariya; **Lebanon:** Pierre Najm, Beirut; Sami Azar, Beirut; George Halabi, Beirut; **Poland:** Krzysztof Strojek, Zabrze; Maria Gorska, Bialystok; Elzbieta Bandurska-Stankiewicz, Olsztyn; Magdalena Pedich, Bialstok; Irena Szykowna, Lubin; Marek Niewiedziol, Lublin; Krzystof Marczewski, Zamosc; Dariusz Sowinski, Wroclaw; Grazyna Majcher-Witczak, Kielce; Andrezej Stankiewicz, Krakow; Maciej Strawczynski, Plock; Jacek Kubica, Bydgoszcz; Wlodzimierz Sadlecki, Grudziadz; **Romania:** Radu Lichiardopol, Bucuresti; Nicolae Hancu, Cluj-Napoca; Maria Mota, Craiova; Magdalena Morosanu, Galati; Mariana Graur, Iasi; Adrian Albota, Brasov; **Russian Federation:** Natalia Vorokhobina, Saint Petersburg; Sergej Shoustov, Saint Petersburg; Ashot Mkrtoumian, Moscow; Irina Demidova, Lobenskaya; S Ametov, Moscow; Alsu Zalevskaya, Saint Petersburg; Arkadiy Vertkin, Moscow; Svetlana Boldueva, Saint Petersburg; **Slovakia:** Marian Mokan, Martin; J Okapcova, Banksa Bystrica; Jana Sirotiakova, Nitra; **Slovenia:** M Vrtovec, Ljubljana; Jurij Subic, Maribor; **South Africa:** J R Wing, Parktown; Puvanesveri Naiker, Durban; Francois Bonnici, Cape Town; Aslam Amod, Durban; M E Seeber, Queenswood; Magda Conradie, Tygerberg; Sindeep A Bhana, Gautneg; **Spain:** Wifred Ricart Engel, Barcelona; Emilio Ortega Martinez De La Victoria, Barcelona; Teresa Muros De Fuentes, Granada; **Turkey:** Yuksel Altunas, Istanbul; Haluk Sargin, Istanbul; Aytekin Oguz, Istanbul; Gungor Akcay, Erzurum; Fahrettin Kelestimur, Kayseri; **United Kingdom:** Ian Gallen, Buckinghamshire; J Harvey, Wrexham; Ian J Lawrence, Leicester; Stephen C Jones, Middlesborough; Michael Sampson, Norwich; Douglas Robertson, West Bromwich; John Wilding, Liverpool; Charles Fox, Northampton. **Data Monitoring Committee**: chair: Stuart Pocock, Ph.D., James B. Meigs, M.D., MPH,; Ivan Tkac, M.D., Ph.D., Desmond Julian, C.B.E., M.D., Michael D. Clayman, M.D., Michael G. Wilson. **Adjudication Board**: chair: Peter W. F. Wilson, M.D., vice-chair: Professor Bozidar Vrhovac, Professor Pal Kikely, Dr. José Luis López Sendon, Dr. Sema Akalin, Michael Aschermann, DrSc, Dr. Paul Bratusch-Marrain, W. James Howard, M.D., Dr. Adam Kretowski, Morris Mosseri, M.D.
